# Supplementary material
Source: publisher figshare collection journal article supplement (https://acs.figshare.com/ndownloader/files/4608787)
Supplement: Supplementary file 1 [file 4608787]

**Diastereoselective Synthesis of  $\alpha,\beta'$ -Disubstituted  
Aminomethyl(2-carboxyethyl)phosphinates as Phosphinyl Dipeptide  
Isosteres**

Deleted: S

**Takehiro Yamagishi, Hiroyuki Ichikawa, Terumitsu Haruki,  
and Tsutomu Yokomatsu**

School of Pharmacy, Tokyo University of Pharmacy & Life Sciences  
1432-1 Horinouchi, Hachioji, Tokyo 192-0392, Japan

Email: yokomatsu@ps.toyaku.ac.jp

**Supporting Information-Part I**

**General Information**

All melting points were taken on a Yanagimoto micromelting point apparatus and are uncorrected. IR spectra were recorded on a JASCO FTIR-620. Mass spectra were measured on Micromass Autospec by electrospray ionization. Elemental analysis was performed on an Elemental Vavio EL. NMR spectra were obtained on a Bruker DPX400 NMR Spectrometer ( $^1\text{H}$  NMR: 400 MHz,  $^{13}\text{C}$  NMR: 100 MHz, and  $^{31}\text{P}$  NMR: 162 MHz), Bruker AV-400 NMR Spectrometer ( $^1\text{H}$  NMR: 600 MHz and  $^{13}\text{C}$  NMR: 150 MHz) or Varian Mercury-300 NMR Spectrometer (31P NMR: 121 MHz). The chemical shift data for each signal on  $^1\text{H}$  NMR are given in units of  $\delta$  relative to TMS ( $\delta=0$ ) for  $\text{CDCl}_3$  solution. For  $^{13}\text{C}$  NMR spectra, the chemical shifts in  $\text{CDCl}_3$  are recorded relative to the  $\text{CDCl}_3$  resonance ( $\delta=77.0$ ). The chemical shifts of  $^{31}\text{P}$  are recorded relative to external 85%  $\text{H}_3\text{PO}_4$  ( $\delta=0$ ) with broadband  $^1\text{H}$  decoupling. Column chromatography was carried out using 63-210  $\mu\text{m}$  silica gel 60N (Kanto Chemical Co., Inc.). Analytical TLC was carried out with Merck plates precoated with silica gel 60  $\text{F}_{254}$  (0.25 mm thick). Preparative TLC was performed with Merck plates precoated with silica gel 60  $\text{F}_{254}$  plates (2mm thick).

Deleted: or

Deleted: ¶

## Preparation of $\alpha$ -amino-*H*-phosphinates 4-10

Compounds **4-10** were prepared from **32a-c** as shown in Scheme A. Preparation of **5** and **7** has already been reported.<sup>1,2</sup>

### Scheme A

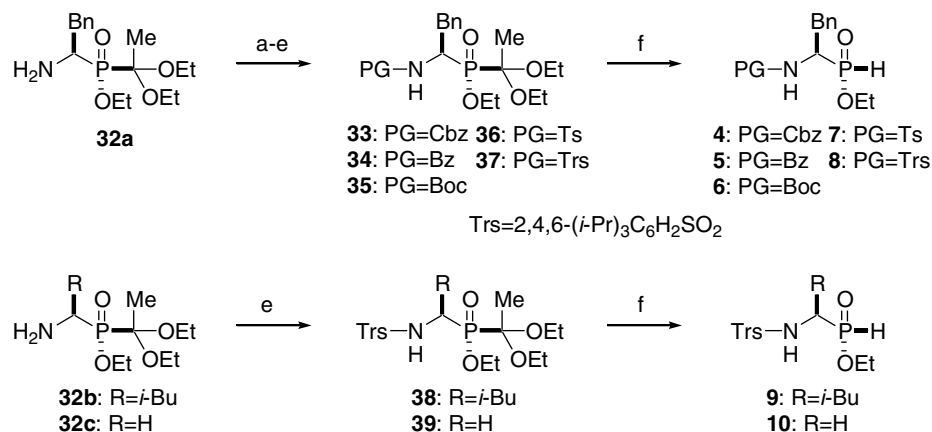

Reagents and conditions: (a) TsCl, Et<sub>3</sub>N, DMAP, CH<sub>2</sub>Cl<sub>2</sub>, 80%; (b) BzCl, Et<sub>3</sub>N, CH<sub>2</sub>Cl<sub>2</sub>, 54%; (c) CbzCl, Et<sub>3</sub>N, CH<sub>2</sub>Cl<sub>2</sub>, 78%; (d) Boc<sub>2</sub>O, NaHCO<sub>3</sub>, dioxane, 65%; (e) TrsCl, Et<sub>3</sub>N, DMAP, CH<sub>2</sub>Cl<sub>2</sub>, **37**: 40%, **38**: 75%, **39**: 46%; (f) TMSCl, EtOH, CH<sub>2</sub>Cl<sub>2</sub>, **4**: 36%, **5**: 67%, **6**: 67%, **7**: 83%, **8**: 45%, **9**: 30%, **10**: 86%.

### (1*R*\*,*R*<sub>P</sub>\*)-Ethyl 1-[[1-(benzyloxy)carbonyl]amino]-2-phenylethyl (1,1-diethoxyethyl)phosphinate (**33**)

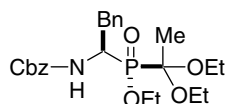

To a solution of **32a** (50 mg, 0.15 mmol) in CH<sub>2</sub>Cl<sub>2</sub> (0.60 mL) was added CbzCl (0.06 mL, 0.46 mmol), Et<sub>3</sub>N (0.06 mL, 0.46 mmol) and stirred for 7 h at room temperature. The mixture was diluted with H<sub>2</sub>O and extracted with Et<sub>2</sub>O. The combined extracts were washed with brine and dried over MgSO<sub>4</sub>. Removal of the solvent gave a residue which was purified by column chromatography (hexane/EtOAc=10:1 to 0:1) to give **33** (55 mg, 78 %). White crystals; mp 85-88 °C; <sup>1</sup>H NMR (400 MHz, CDCl<sub>3</sub>)  $\delta$ : 7.40-7.04 (10H, m), 5.42 (1H, br.d, *J*=10.2 Hz), 5.01 (1H, d, *J*=12.5 Hz), 4.91 (1H, d, *J*=12.5 Hz), 4.47 (1H, ddd, *J*=4.3, 10.7, 21.4 Hz), 4.22 (1H, dq, *J*=7.0, 14.0 Hz), 3.89-3.55 (4H, m), 3.24 (1H, ddd, *J*=4.5, 4.5, 14.3 Hz), 2.91 (1H, ddd, *J*=9.0, 11.0, 15.0 Hz), 1.56 (3H, d, *J*=11.6 Hz), 1.30 (3H, t, *J*=7.0 Hz), 1.21 (3H, t, *J*=7.1 Hz), 1.14 (3H,

t,  $J=7.1$  Hz), 0.88 (3H, t,  $J=7.0$  Hz);  $^{13}\text{C}$  NMR (100 MHz,  $\text{CDCl}_3$ )  $\delta$ : 155.6 (d,  $J_{\text{CP}}=6.2$  Hz), 137.2-126.5 (aromatic), 102.3 (d,  $J_{\text{CP}}=138.3$  Hz), 62.2 (d,  $J_{\text{CP}}=7.5$  Hz), 58.6 (d,  $J_{\text{CP}}=4.9$  Hz), 58.0 (d,  $J_{\text{CP}}=7.0$  Hz), 49.3 (d,  $J_{\text{CP}}=94.1$  Hz), 35.4 (d,  $J_{\text{CP}}=2.3$  Hz), 31.6, 22.6, 16.6 (d,  $J_{\text{CP}}=5.2$  Hz), 15.4, 15.1;  $^{31}\text{P}$  NMR (162 MHz,  $\text{CDCl}_3$ )  $\delta$ : 33.15; IR (KBr) 3222, 1708, 1032  $\text{cm}^{-1}$ ; MS  $m/z$  486 ( $\text{MNa}^+$ ); HRMS calcd for  $\text{C}_{24}\text{H}_{34}\text{NO}_6\text{NaP}$ : 486.2021 ( $\text{MNa}^+$ ). Found: 486.1989.

**(1*R*\*,*R*<sub>P</sub>\*)-Ethyl 1-[(*tert*-butoxycarbonyl)amino]-2-phenylethyl  
(1,1-diethoxyethyl)phosphinate (35)**

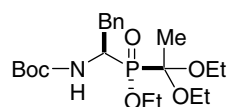

To a solution of **32a** (1.1 g, 3.36 mmol) in dioxane/ $\text{H}_2\text{O}$  2:1 (10.2 mL) was added 1 M  $\text{NaHCO}_3$  solution (3.6 mL, 3.6 mmol),  $\text{Boc}_2\text{O}$  (0.85 mL, 3.74 mmol) at 0 °C and stirred for 2 h at room temperature. To the mixture was added saturated citric acid solution and extracted with EtOAc. The combined extracts were washed with brine and dried over  $\text{K}_2\text{CO}_3$ . Removal of the solvent gave a residue which was purified by column chromatography (hexane/EtOAc=10:1 to 1:1) to give **35** (940 mg, 65 %). White crystals; mp 91-93 °C;  $^1\text{H}$  NMR (400 MHz,  $\text{CDCl}_3$ )  $\delta$ : 7.28-7.16 (5H, m), 5.04-5.01 (1H, br.d,  $J=10.2$  Hz), 4.40 (1H, ddd,  $J=4.4, 16.3, 21.8$  Hz), 4.23 (2H, dq,  $J=7.0, 7.0$  Hz), 3.90-3.55 (4H, m), 3.21 (1H, ddd,  $J=4.0, 4.0, 14.0$  Hz), 2.86 (1H, ddd,  $J=5.1, 11.0, 7.3$  Hz), 1.56 (3H, d,  $J=11.6$  Hz), 1.31 (3H, t,  $J=7.1$  Hz), 1.26 (9H, s), 1.222 (3H, t,  $J=7.0$  Hz), 1.218 (3H, t,  $J=7.1$  Hz);  $^{13}\text{C}$  NMR (100 MHz,  $\text{CDCl}_3$ )  $\delta$ : 174.7 (d,  $J_{\text{CP}}=6.9$  Hz), 137.3-126.3 (aromatic), 102.2 (d,  $J_{\text{CP}}=137.9$  Hz), 79.3, 62.1 (d,  $J_{\text{CP}}=7.3$  Hz), 58.4 (d,  $J_{\text{CP}}=5.0$  Hz), 57.9 (d,  $J_{\text{CP}}=6.8$  Hz), 48.4 (d,  $J_{\text{CP}}=94.8$  Hz), 35.6, 28.1, 19.9 (d,  $J_{\text{CP}}=12.7$  Hz), 16.5 (d,  $J_{\text{CP}}=5.3$  Hz), 15.4, 15.2;  $^{31}\text{P}$  NMR (162 MHz,  $\text{CDCl}_3$ )  $\delta$ : 42.73; IR (KBr) 3277, 1698, 1049  $\text{cm}^{-1}$ ; MS  $m/z$  430 ( $\text{MH}^+$ ); HRMS calcd for  $\text{C}_{21}\text{H}_{37}\text{NO}_6\text{P}$ : 430.2359 ( $\text{MH}^+$ ). Found: 430.2355. Anal. Calcd for  $\text{C}_{21}\text{H}_{36}\text{NO}_6\text{P}$ : C, 58.73; H, 8.45; N, 3.26. Found: C, 58.74; H, 8.31; N, 3.19.

**(1*R*\*,*R*<sub>P</sub>\*)-Ethyl 1,1-diethoxyethyl(2-phenyl-1-[(2,4,6-triisopropylphenyl)sulfonyl]amino)ethyl)phosphinate (37)**

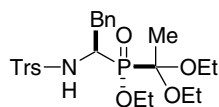

To a solution of **32a** (3.1 g, 12.8 mmol), TrsCl (10.2 g, 19.3 mmol) and DMAP (1.6 g, 7.7 mmol) in  $\text{CH}_2\text{Cl}_2$  (40 mL) was added  $\text{Et}_3\text{N}$  (7.8 mL, 32.1 mmol) and stirred for 25 h at room temperature. To the mixture was added  $\text{H}_2\text{O}$  and extracted with  $\text{Et}_2\text{O}$ . The combined extracts

were washed with brine and dried over  $\text{MgSO}_4$ . Removal of the solvent gave a residue which was purified by column chromatography (hexane/EtOAc=5:1 to 2:1) to give **37** (3.0 g, 40 %). White crystals; mp 118-120 °C;  $^1\text{H}$  NMR (400 MHz,  $\text{CDCl}_3$ )  $\delta$ : 7.16-7.00 (7H, m), 6.01-5.97 (1H, m), 4.30 (1H, ddd,  $J=7.0, 7.0, 20.6$  Hz), 4.13-3.61 (8H, m), 3.19 (1H, ddd,  $J=7.9, 11.6, 13.9$  Hz), 2.92-2.82 (2H, m), 1.54 (3H, d,  $J=11.8$  Hz), 1.29-1.20 (21H, m), 1.17 (3H, t,  $J=7.1$  Hz), 1.11 (3H, t,  $J=7.1$  Hz);  $^{13}\text{C}$  NMR (100 MHz,  $\text{CDCl}_3$ )  $\delta$ : 152.3-123.6 (aromatic), 102.8 (d,  $J_{\text{CP}}=141.4$  Hz), 62.1 (d,  $J_{\text{CP}}=7.3$  Hz), 58.9 (d,  $J_{\text{CP}}=4.2$  Hz), 58.1 (d,  $J_{\text{CP}}=7.6$  Hz), 52.5 (d,  $J_{\text{CP}}=85.5$  Hz), 37.3, 34.1, 29.8, 24.9, 24.6, 23.6, 23.5, 16.1 (d,  $J_{\text{CP}}=5.6$  Hz), 15.3, 15.0;  $^{31}\text{P}$  NMR (162 MHz,  $\text{CDCl}_3$ )  $\delta$ : 40.73; IR (KBr) 3089, 1328, 1163, 1034  $\text{cm}^{-1}$ ; MS  $m/z$  596 ( $\text{MH}^+$ ); HRMS calcd for  $\text{C}_{31}\text{H}_{51}\text{NO}_6\text{PS}$ : 596.3175 ( $\text{MH}^+$ ). Found: 596.3154. Anal. Calcd for  $\text{C}_{31}\text{H}_{50}\text{NO}_6\text{PS}$ : C, 62.5; H, 8.46; N, 2.35. Found: C, 62.36; H, 8.53; N, 2.10.

**(1*R*\*,*S*<sub>P</sub>\*)-Ethyl 1-[[1-(benzyloxy)carbonyl]amino]-2-phenylethylphosphinate (4)**

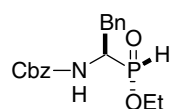

To a solution of **33** (500 mg, 1.08 mmol) in EtOH (0.23 mL) and  $\text{CH}_2\text{Cl}_2$  (2.1 mL) was added TMSCl (0.21 mL, 1.62 mmol) at 0 °C and stirred for 2 h at room temperature. Concentration of the mixture gave a residue which was purified by column chromatography (hexane/EtOAc=10:1 to 1:1) to give **4** (134 mg, 36 %). A colorless oil;  $^1\text{H}$  NMR (400 MHz,  $\text{CDCl}_3$ )  $\delta$ : 7.35-7.04 (10H, m), 7.10 (1H,  $J=556.3$  Hz), 5.22 (1H, br.d,  $J=6.4$  Hz), 5.03 (2H, s), 4.31-4.04 (3H, m), 3.25-2.88 (2H, m), 1.32 (3H, t,  $J=6.8$  Hz);  $^{13}\text{C}$  NMR (100 MHz,  $\text{CDCl}_3$ )  $\delta$ : 156.0 (d,  $J_{\text{CP}}=2.0$  Hz), 136.0-127.0 (aromatic), 67.2, 63.1 (d,  $J_{\text{CP}}=6.6$  Hz), 55.8 (d,  $J_{\text{CP}}=109.14$  Hz), 33.2, 16.2 (d,  $J_{\text{CP}}=5.2$  Hz);  $^{31}\text{P}$  NMR (162 MHz,  $\text{CDCl}_3$ )  $\delta$ : 41.64; IR (neat) 3032, 1715, 1043  $\text{cm}^{-1}$ ; MS  $m/z$  370 ( $\text{MNa}^+$ ); HRMS calcd for  $\text{C}_{18}\text{H}_{22}\text{NO}_4\text{NaP}$ : 370.1184 ( $\text{MH}^+$ ). Found: 370.1184.

**(1*R*\*,*S*<sub>P</sub>\*)-Ethyl 1-[(*tert*-butoxycarbonyl)amino]-2-phenylethylphosphinate (6)**

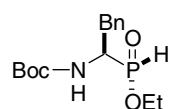

This compound was prepared from **35** (500 mg, 1.16 mmol) in an analogous manner to that for **4**. Purification of the residue by column chromatography (hexane/EtOAc=10:1 to 1:1.5) gave **6** (243 mg, 67 %). A colorless oil;  $^1\text{H}$  NMR (400 MHz,  $\text{CDCl}_3$ )  $\delta$ : 7.35-7.21 (5H, m), 5.06 (1H, d,  $J=554.8$  Hz), 4.80 (1H, br.d,  $J=9.0$  Hz), 4.29-4.07 (3H, m), 3.17 (1H, ddd,  $J=5.4, 8.4,$

13.9 Hz), 3.00-2.91 (1H, m), 1.34 (9H, s), 1.34-1.26 (3H, m);  $^{13}\text{C}$  NMR (100 MHz,  $\text{CDCl}_3$ )  $\delta$ : 155.2, 136.1-126.9 (aromatic), 80.4, 63.0 (d,  $J_{\text{CP}}=7.3$  Hz), 50.1 (d,  $J_{\text{CP}}=108.5$  Hz), 33.3, 28.1, 16.2 (d,  $J_{\text{CP}}=5.8$  Hz);  $^{31}\text{P}$  NMR (162 MHz,  $\text{CDCl}_3$ )  $\delta$ : 41.71; IR (neat) 3257, 1709, 1049  $\text{cm}^{-1}$ ; MS  $m/z$  336 ( $\text{MNa}^+$ ); HRMS calcd for  $\text{C}_{15}\text{H}_{24}\text{NO}_4\text{NaP}$ : 336.1341 ( $\text{MNa}^+$ ). Found: 336.1309.

**(1*R*\*,*S*<sub>P</sub>\*)-Ethyl 2-phenyl-1-[(2,4,6-triisopropylphenyl)sulfonyl]amino}ethyl phosphinate (8)**

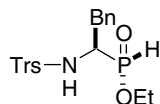

This compound was prepared from **37** (723 mg, 1.21 mmol) in an analogous manner to that for **4**. Purification of the residue by column chromatography (hexane/EtOAc=10:1 to 1.5:1) gave **8** (240 mg, 45 %). White crystals; mp 150-155 °C;  $^1\text{H}$  NMR (400 MHz,  $\text{CDCl}_3$ )  $\delta$ : 7.21-7.04 (7H, m), 7.03 (1H, d,  $J=567.4$  Hz), 6.21-6.18 (1H, m), 4.08 (2H, dq,  $J=6.7$  Hz), 3.98-3.85 (3H, m), 3.20 (1H, ddd,  $J=7.2, 13.5, 13.5$  Hz), 3.00 (1H, ddd,  $J=7.1, 14.5, 14.7$  Hz), 2.94-2.84 (1H, m), 1.26-1.21 (18H, m), 1.16 (3H, t,  $J=7.1$  Hz);  $^{13}\text{C}$  NMR (100 MHz,  $\text{CDCl}_3$ )  $\delta$ : 153.0-123.7 (aromatic), 62.7 (d,  $J_{\text{CP}}=7.4$  Hz), 52.5 (d,  $J_{\text{CP}}=108.5$  Hz), 34.1, 29.9, 29.8, 24.9, 24.8, 23.6, 16.0 (d,  $J_{\text{CP}}=5.6$  Hz);  $^{31}\text{P}$  NMR (162 MHz,  $\text{CDCl}_3$ )  $\delta$ : 34.85; IR (KBr) 3116, 1330, 1166, 1038  $\text{cm}^{-1}$ ; MS  $m/z$  480 ( $\text{MH}^+$ ); HRMS calcd for  $\text{C}_{25}\text{H}_{39}\text{NO}_4\text{PS}$ : 480.2337 ( $\text{MH}^+$ ). Found: 480.2337. Anal. Calcd for  $\text{C}_{25}\text{H}_{38}\text{NO}_4\text{PS}$ : C, 62.61; H, 7.99; N, 2.92. Found: C, 62.51; H, 7.89; N, 2.82.

**(1*R*\*,*R*<sub>P</sub>\*)-Ethyl 1,1-diethoxyethyl(3-methyl-1-[(2,4,6-triisopropylphenyl)sulfonyl]amino}butyl)phosphinate (38)**

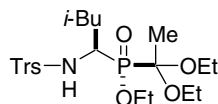

This compound was prepared from **32b** (483 mg, 1.63 mmol) in an analogous manner to that for **37**. Purification of the residue by column chromatography (hexane/EtOAc=5:1 to 2:1) gave **38** (360 mg, 75 %). White crystals; mp 117-118 °C;  $^1\text{H}$  NMR (400 MHz,  $\text{CDCl}_3$ )  $\delta$ : 7.09 (2H, s), 5.70-5.67 (1H, m), 4.25-4.03 (4H, m), 3.99-3.88 (1H, m), 3.79-3.65 (4H, m), 2.94-2.84 (1H, m), 1.74-1.58 (2H, m), 1.59 (3H, d,  $J=11.5$  Hz), 1.46-1.36 (1H, m), 1.29-1.17 (27H, m), 0.69 (3H, d,  $J=6.5$  Hz), 0.68 (3H, d,  $J=6.6$  Hz);  $^{13}\text{C}$  NMR (100 MHz,  $\text{CDCl}_3$ )  $\delta$ : 152.4-123.4 (aromatic), 103.2 (d,  $J_{\text{CP}}=142.2$  Hz), 62.0 (d,  $J_{\text{CP}}=7.2$  Hz), 59.0 (d,  $J_{\text{CP}}=4.6$  Hz), 58.2 (d,  $J_{\text{CP}}=7.3$  Hz), 49.7 (d,  $J_{\text{CP}}=86.5$  Hz), 40.6 (d,  $J_{\text{CP}}=2.4$  Hz), 34.2, 29.9, 24.9, 24.7, 24.5 (d,  $J_{\text{CP}}=8.0$  Hz), 23.7, 22.7,

21.7, 16.5 (d,  $J_{\text{CP}}=5.3$  Hz), 15.4, 15.1;  $^{31}\text{P}$  NMR (162 MHz,  $\text{CDCl}_3$ )  $\delta$ : 41.60; IR (KBr) 3096, 1017  $\text{cm}^{-1}$ ; MS  $m/z$  584 ( $\text{MNa}^+$ ); HRMS calcd for  $\text{C}_{28}\text{H}_{52}\text{NO}_6\text{NaPS}$ : 584.3151 ( $\text{MNa}^+$ ). Found: 584.3145.

**Ethyl 1,1-diethoxyethyl(2,4,6-triisopropylphenyl)sulfonylamino}methyl phosphinate (39)**

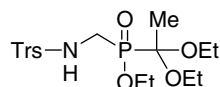

This compound was prepared from **32c** (539 mg, 2.25 mmol) in an analogous manner to that for **37**. Purification of the residue by column chromatography (hexane/EtOAc=5:1 to 2:1) gave **39** (520 mg, 46 %). A colorless oil;  $^1\text{H}$  NMR (400 MHz,  $\text{CDCl}_3$ )  $\delta$  7.18 (2H, s), 5.12-5.08 (1H, m), 4.24-4.06 (4H, m), 3.73-3.58 (4H, m), 3.35 (2H, ddd,  $J=5.8, 9.4$  Hz), 2.95-2.85 (1H, m), 1.28 (3H, d,  $J=11.8$  Hz), 1.31-1.24 (3H, m), 1.28 (12H, d,  $J=6.7$  Hz), 1.25 (6H, t,  $J=6.9$  Hz), 1.17 (3H, t,  $J=7.3$  Hz), 1.16 (3H, t,  $J=7.3$  Hz);  $^{13}\text{C}$  NMR (100 MHz,  $\text{CDCl}_3$ )  $\delta$  155.5-123.9 (aromatic), 100.9 (d,  $J_{\text{CP}}=137.3$  Hz), 61.9 (d,  $J_{\text{CP}}=7.1$  Hz), 58.3 (d,  $J_{\text{CP}}=4.6$  Hz), 57.6 (d,  $J_{\text{CP}}=7.4$  Hz), 39.3 (d,  $J_{\text{CP}}=92.7$  Hz), 34.1, 31.5, 29.6, 24.8, 24.7, 23.55, 23.52, 16.2 (d,  $J_{\text{CP}}=5.4$  Hz), 15.3, 15.0;  $^{31}\text{P}$  NMR (162 MHz,  $\text{CDCl}_3$ )  $\delta$  40.68; IR (neat) 2961, 1600, 1037  $\text{cm}^{-1}$ .

**(1*R*\*,*S**P*\*)-Ethyl 3-methyl-1-[(2,4,6-triisopropylphenyl)sulfonylamino}butyl phosphinate (9)**

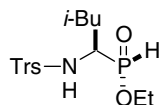

This compound was prepared from **38** (310 mg, 1.05 mmol) in an analogous manner to that for **4**. Purification of the residue by column chromatography (hexane/EtOAc=5:1 to 1:2) gave **9** (139 mg, 30 %). White crystals; mp 167-169  $^{\circ}\text{C}$ ;  $^1\text{H}$  NMR (400 MHz,  $\text{CDCl}_3$ )  $\delta$  7.16 (2H, s), 6.97 (1H, d,  $J=560.7$  Hz), 5.62-5.59 (1H, m), 4.18-4.00 (4H, m), 3.65-3.57 (1H, m), 2.98-2.82 (1H, m), 1.53-1.23 (24H, m), 0.81 (3H, d,  $J=6.0$  Hz), 0.68 (3H, t,  $J=6.0$  Hz);  $^{13}\text{C}$  NMR (100 MHz,  $\text{CDCl}_3$ )  $\delta$  153.0-123.4 (aromatic), 63.0 (d,  $J_{\text{CP}}=7.4$  Hz), 50.1 (d,  $J_{\text{CP}}=109.3$  Hz), 36.4, 34.2, 29.8, 25.0, 24.8, 23.8 (d,  $J_{\text{CP}}=9.6$  Hz), 23.59, 23.55, 22.8, 21.1, 16.7 (d,  $J_{\text{CP}}=5.5$  Hz);  $^{31}\text{P}$  NMR (162 MHz,  $\text{CDCl}_3$ )  $\delta$  35.69; IR (KBr) 3127, 1329, 1162, 1060  $\text{cm}^{-1}$ ; MS  $m/z$  446 ( $\text{MH}^+$ ); HRMS calcd for  $\text{C}_{22}\text{H}_{41}\text{NO}_4\text{PS}$ : 446.2494 ( $\text{MH}^+$ ). Found: 446.2506. Anal. Calcd for  $\text{C}_{22}\text{H}_{40}\text{NO}_4\text{PS}$ : C, 59.30; H, 9.05; N, 3.14. Found: C, 59.03; H, 8.85; N, 2.96.

**Ethyl [(2,4,6-triisopropylphenyl)sulfonyl]amino}methylphosphinate (10)**

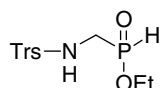

This compound was prepared from **39** (463 mg, 0.92 mmol) in an analogous manner to that for **4**. Purification of the residue by column chromatography (hexane/EtOAc=5:1 to 1:2) gave **10** (308 mg, 86 %). White crystals; mp 108-114 °C; <sup>1</sup>H NMR (400 MHz, CDCl<sub>3</sub>) δ 7.18 (2H, s), 7.16 (1H, d, *J*=569.2 Hz), 5.44 (1H, br.s), 4.25-4.06 (4H, m), 3.40 (2H, m), 2.96-2.85 (1H, m), 1.35 (3H, t, *J*=7.1 Hz), 1.30-1.19 (18H, m); <sup>13</sup>C NMR (100 MHz, CDCl<sub>3</sub>) δ 153.3-123.8 (aromatic), 63.5 (d, *J*<sub>CP</sub>=6.6 Hz), 40.4 (d, *J*<sub>CP</sub>=104.7 Hz), 34.1, 29.1, 24.8, 23.5, 16.7 (d, *J*<sub>CP</sub>=5.8 Hz); <sup>31</sup>P NMR (162 MHz, CDCl<sub>3</sub>) δ 30.75; IR (KBr) 3131, 1325, 1157, 1040 cm<sup>-1</sup>; MS *m/z* 390 (MH<sup>+</sup>); HRMS calcd for C<sub>18</sub>H<sub>33</sub>NO<sub>4</sub>PS: 390.1868 (MH<sup>+</sup>). Found: 390.1874.

**(1*R*\*,*R*<sub>P</sub>\*)-tert-Butyl 3-[ethoxy(1-[(4-methylphenyl)sulfonyl]amino)-2-phenylethyl]phosphoryl]propanoate (14)**

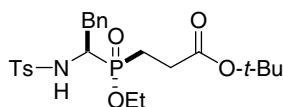

To a stirred solution of **7** (673 mg, 1.83 mmol) and *t*-butyl acrylate (0.3 mL, 2.0 mmol) in THF (3.6 mL) was added a solution of *t*-BuOMgBr in THF (1.8 mL) at -20 °C, prepared from *t*-BuOH (136 mg, 1.83 mmol) and 0.98 M hexane solution of MeMgBr (1.87 mL, 1.83 mmol) *in situ*. After stirring for 17 h at 0 °C, the mixture was concentrated to give a residue, which was purified by column chromatography (hexane/EtOAc=10:1 to 1:1) to give **14** (800 mg, 83%). White crystals; mp 120-124 °C; <sup>1</sup>H NMR (400 MHz, CDCl<sub>3</sub>) δ: 7.50-7.02 (9H, m), 6.07-5.91 (1H, br.m), 4.09-3.85 (3H, m), 3.09 (1H, ddd, *J*=6.1, 10.0, 14.4 Hz), 2.78 (1H, ddd, *J*=8.2, 12.4, 14.1 Hz), 2.61-2.45 (2H, m), 2.37 (3H, s), 2.11-2.03 (2H, m), 1.44 (9H, s), 1.21 (3H, t, *J*=7.0 Hz); <sup>13</sup>C NMR (100 MHz, CDCl<sub>3</sub>) δ: 171.1 (d, *J*<sub>CP</sub>=15.9 Hz), 143.2-128.7 (aromatic), 81.0, 61.9 (d, *J*<sub>CP</sub>=6.9 Hz), 53.7 (d, *J*<sub>CP</sub>=99.7 Hz), 35.1 (d, *J*<sub>CP</sub>=2.7 Hz), 28.0, 27.6 (d, *J*<sub>CP</sub>=2.6 Hz), 21.8 (d, *J*<sub>CP</sub>=90.4 Hz), 21.4, 16.5 (d, *J*<sub>CP</sub>=5.6 Hz); <sup>31</sup>P NMR (162 MHz, CDCl<sub>3</sub>) δ: 53.88; IR (KBr) 3137, 1333, 1160, 1033 cm<sup>-1</sup>; MS *m/z* 469 (MH<sup>+</sup>); HRMS calcd for C<sub>24</sub>H<sub>35</sub>NO<sub>6</sub>PS: 496.1923 (MH<sup>+</sup>). Found: 496.1926. Anal. Calcd for C<sub>24</sub>H<sub>34</sub>NO<sub>6</sub>PS: C, 58.17; H, 6.92; N, 2.83. Found: C, 58.22; H, 7.13; N, 2.76.

**(1*R*\*,*R*<sub>P</sub>\*)-tert-Butyl 3-[(1-[(benzyloxy)carbonyl]amino)-2-phenylethyl](ethoxy)phosphoryl]propanoate (11)**

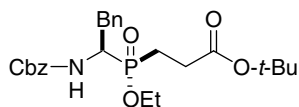

This compound was prepared from **4** (134 mg, 0.39 mmol) in an analogous manner to that for **14**. Purification of the residue by column chromatography (hexane/EtOAc=10:1 to 1:1.5) gave **11** (124 mg, 93 %). White crystals; mp 138-139 °C;  $^1\text{H}$  NMR (400 MHz,  $\text{CDCl}_3$ )  $\delta$ : 7.32-7.06 (10H, m), 5.38 (1H, br.d,  $J=10.2$  Hz), 5.00 (1H, d,  $J=12.4$  Hz), 4.94 (1H, d,  $J=12.4$  Hz), 4.32 (1H, ddd,  $J=4.0, 10.6, 21.4$  Hz), 4.11 (2H, dq,  $J=7.1, 7.1$  Hz), 3.22 (1H, ddd,  $J=4.4, 4.4, 14.4$  Hz), 2.85 (1H, ddd,  $J=8.8, 11.4, 14.1$  Hz), 2.61-2.45 (2H, m), 2.07 (2H, dt,  $J=7.9, 13.2$  Hz), 1.44 (9H, s), 1.29 (3H, t,  $J=7.0$  Hz);  $^{13}\text{C}$  NMR (100 MHz,  $\text{CDCl}_3$ )  $\delta$ : 171.5 (d,  $J_{\text{CP}}=14.29$  Hz), 155.9, 136.61-126.8 (aromatic), 81.1, 66.9, 61.4 (d,  $J_{\text{CP}}=6.7$  Hz), 50.31 (d,  $J_{\text{CP}}=105.5$  Hz), 34.3, 28.0, 27.7 (d,  $J_{\text{CP}}=2.9$  Hz), 21.2 (d,  $J_{\text{CP}}=90.5$  Hz), 16.6 (d,  $J_{\text{CP}}=5.5$  Hz);  $^{31}\text{P}$  NMR (162 MHz,  $\text{CDCl}_3$ )  $\delta$ : 52.91; IR (KBr) 3204, 1721, 1044  $\text{cm}^{-1}$ ; MS  $m/z$  476 ( $\text{MH}^+$ ); HRMS calcd for  $\text{C}_{25}\text{H}_{35}\text{NO}_6\text{P}$ : 476.2202 ( $\text{MH}^+$ ). Found: 476.2216.

**(1R\*,R<sub>P</sub>\*)-tert-Butyl 3-[[1-(benzoylamino)-2-phenylethyl](ethoxy)phosphoryl]propanoate (12)**

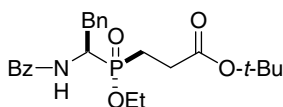

This compound was prepared from **5** (0.28 mg, 0.76 mmol) in an analogous manner to that for **14**. Purification of the residue by column chromatography (hexane/EtOAc=10:1 to 1:1) gave **12** (256 mg, 78%). White crystals; mp 159-163 °C;  $^1\text{H}$  NMR (400 MHz,  $\text{CDCl}_3$ )  $\delta$ : 7.72-7.14 (10H, m), 4.93 (1H, m), 4.14 (2H, dq,  $J=7.1, 7.1$  Hz), 3.30 (1H, ddd,  $J=4.8, 4.8, 14.4$  Hz), 3.11 (1H, ddd,  $J=9.3, 11.1, 14.3$  Hz), 2.86-2.45 (2H, m), 2.17-2.16 (2H, m), 1.41 (9H, s), 1.33 (3H, t,  $J=7.0$  Hz);  $^{13}\text{C}$  NMR (100 MHz,  $\text{CDCl}_3$ )  $\delta$ : 171.6 (d,  $J_{\text{CP}}=14.3$  Hz), 167.4 (d,  $J_{\text{CP}}=3.9$  Hz), 136.4-126.7 (aromatic), 81.0, 61.4 (d,  $J_{\text{CP}}=6.9$  Hz), 48.5 (d,  $J_{\text{CP}}=74.0$  Hz), 33.7, 28.0, 27.8, 21.6 (d,  $J_{\text{CP}}=89.9$  Hz), 16.6 (d,  $J_{\text{CP}}=5.3$  Hz);  $^{31}\text{P}$  NMR (162 MHz,  $\text{CDCl}_3$ )  $\delta$ : 53.77; IR (KBr) 3261, 1722, 1657, 1034  $\text{cm}^{-1}$ ; MS  $m/z$  446 ( $\text{MH}^+$ ); HRMS calcd for  $\text{C}_{24}\text{H}_{33}\text{NO}_5\text{P}$ : 446.2096 ( $\text{MH}^+$ ). Found: 446.2068.

**(1R\*,R<sub>P</sub>\*)-tert-Butyl 3-[[1-[(tert-butoxycarbonyl)amino]-2-phenylethyl](ethoxy)phosphoryl]propanoate (13)**



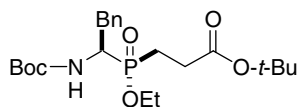

This compound was prepared from **6** (243 mg, 0.78 mmol) in an analogous manner to that for **14**. Purification of the residue by column chromatography (hexane/EtOAc=10:1 to 1:1) gave **13** (309 mg, 90%). White crystals; mp 118-120 °C; <sup>1</sup>H NMR (400 MHz, CDCl<sub>3</sub>) δ: 7.30-7.29 (5H, m), 5.05 (1H, br.d, *J*=10.3 Hz), 4.29-4.27 (1H, m), 4.12 (2H, dq, *J*=6.8, 6.8 Hz), 3.21-3.16 (1H, m), 2.86-2.83 (1H, m), 2.58-2.52 (2H, m), 2.11-2.04 (2H, m), 1.44 (9H, s), 1.33-1.32 (3H, m); <sup>13</sup>C NMR (100 MHz, CDCl<sub>3</sub>) δ: 171.5 (d, *J*<sub>CP</sub>=15.6 Hz), 155.2 (d, *J*<sub>CP</sub>=2.6 Hz), 136.8-126.5 (aromatic), 80.9, 80.0, 61.2 (d, *J*<sub>CP</sub>=6.6 Hz), 49.3 (d, *J*<sub>CP</sub>=107.0 Hz), 34.1, 30.8, 28.0, 27.7, 21.3 (d, *J*<sub>CP</sub>=90.2 Hz), 16.5 (d, *J*<sub>CP</sub>=5.5 Hz); <sup>31</sup>P NMR (162 MHz, CDCl<sub>3</sub>) δ: 53.75; IR (KBr) 3271, 3215, 1732, 1708, 1032 cm<sup>-1</sup>; MS *m/z* 442 (MH<sup>+</sup>); HRMS calcd for C<sub>22</sub>H<sub>37</sub>NO<sub>6</sub>P: 442.2359 (MH<sup>+</sup>). Found: 442.2362. Anal. Calcd for C<sub>22</sub>H<sub>36</sub>NO<sub>6</sub>P: C, 59.85; H, 8.22; N, 3.17. Found: C, 59.55; H, 8.27; N, 2.83.

**(1R\*,2R\*)-tert-Butyl 3-[ethoxy(2-phenyl-1-[(2,4,6-triisopropylphenyl)sulfonyl]amino)ethyl]phosphoryl]propanoate (**15**)**

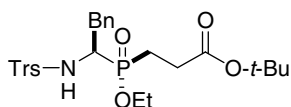

This compound was prepared from **8** (200 mg, 0.42 mmol) in an analogous manner to that for **14**. Purification of the residue by column chromatography (hexane/EtOAc=10:1 to 1:1) gave **15** (235 mg, 92 %). White crystals; mp 145-147 °C; <sup>1</sup>H NMR (400 MHz, CDCl<sub>3</sub>) δ 7.14-7.04 (7H, m), 6.13 (1H, br.d, *J*=8.8 Hz), 4.08 (2H, dq, *J*=6.8, 13.4 Hz), 4.02-3.89 (2H, m), 3.81-3.71 (1H, m), 3.17 (1H, ddd, *J*=7.7, 13.6, 13.6 Hz), 2.94 (2H, m), 2.50 (2H, ddd, *J*=7.7, 7.7, 12.5 Hz), 2.13-1.97 (2H, m), 1.42 (9H, s), 1.28-1.23 (18H, m), 1.10 (3H, t, *J*=7.0 Hz); <sup>13</sup>C NMR (100 MHz, CDCl<sub>3</sub>) δ 171.4 (d, *J*<sub>CP</sub>=14.1 Hz), 152.7-123.7 (aromatic), 80.9, 61.0 (d, *J*<sub>CP</sub>=6.8 Hz), 52.6 (d, *J*<sub>CP</sub>=103.5 Hz), 35.8 (d, *J*<sub>CP</sub>=1.9 Hz), 34.1, 29.8, 27.9, 27.7 (d, *J*<sub>CP</sub>=3.5 Hz), 24.9, 24.8, 23.54, 23.46, 21.5 (d, *J*<sub>CP</sub>=92.1 Hz), 16.2 (d, *J*<sub>CP</sub>=5.7 Hz); <sup>31</sup>P NMR (162 MHz, CDCl<sub>3</sub>) δ 52.93; IR (KBr) 3136, 1729, 1363, 1195, 1037 cm<sup>-1</sup>; MS *m/z* 630 (MNa<sup>+</sup>); HRMS calcd for C<sub>32</sub>H<sub>50</sub>NO<sub>6</sub>NaPS: 630.2994 (MNa<sup>+</sup>). Found: 630.2983.; Anal. Calcd for C<sub>32</sub>H<sub>50</sub>NO<sub>6</sub>PS: C, 63.24; H, 8.29; N, 2.30. Found: C, 63.10; H, 8.20; N, 2.00.

**(1R\*,2R\*)-tert-Butyl 3-[ethoxy(3-methyl-1-[(2,4,6-triisopropylphenyl)sulfonyl]amino)butyl]phosphoryl]propanoate (**16**)**

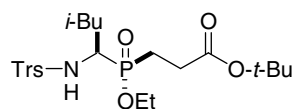

This compound was prepared from **9** (100 mg, 0.22 mmol) in an analogous manner to that for **14**. Purification of the residue by column chromatography (hexane/EtOAc=5:1 to 2:1) gave **16** (86 mg, 67 %). White crystals; mp 174-176 °C;  $^1\text{H}$  NMR (400 MHz,  $\text{CDCl}_3$ )  $\delta$  7.17 (2H, s), 5.40 (1H, br.d,  $J=8.5$  Hz), 4.16-3.98 (4H, m), 3.76-3.62 (1H, m), 1.61-1.23 (24H, m), 1.46 (9H, s), 0.69 (3H, d,  $J=6.6$  Hz), 0.66 (3H, d,  $J=6.5$  Hz);  $^{13}\text{C}$  NMR (100 MHz,  $\text{CDCl}_3$ )  $\delta$  171.8 (d,  $J_{\text{CP}}=7.4$  Hz), 152.8-123.6 (aromatic), 81.1, 61.3 (d,  $J_{\text{CP}}=6.9$  Hz), 50.1 (d,  $J_{\text{CP}}=104.7$  Hz), 38.8 (d,  $J_{\text{CP}}=2.0$  Hz), 34.2, 29.9, 28.0, 27.9 (d,  $J_{\text{CP}}=3.5$  Hz), 24.9, 24.8, 24.5 (d,  $J_{\text{CP}}=8.9$  Hz), 23.61, 23.59, 22.8, 21.5, 20.9 (d,  $J_{\text{CP}}=91.0$  Hz), 16.5 (d,  $J_{\text{CP}}=5.4$  Hz);  $^{31}\text{P}$  NMR (162 MHz,  $\text{CDCl}_3$ )  $\delta$  53.69; IR (KBr) 3137, 1726, 1326, 1153, 1039  $\text{cm}^{-1}$ ; MS  $m/z$  574 ( $\text{MH}^+$ ); HRMS calcd for  $\text{C}_{29}\text{H}_{53}\text{NO}_6\text{PS}$ : 574.3331 ( $\text{MH}^+$ ). Found: 574.3325.

***tert*-Butyl 3-[ethoxy({[(2,4,6-triisopropylphenyl)sulfonyl]amino}methyl)phosphoryl]propanoate (**17**)**

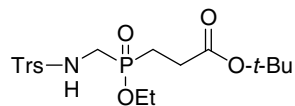

This compound was prepared from **10** (100 mg, 0.26 mmol) in an analogous manner to that for **14**. Purification of the residue by column chromatography (hexane/EtOAc=5:1 to 2:1) gave **17** (132 mg, 99 %). White crystals; mp 114-116 °C;  $^1\text{H}$  NMR (400 MHz,  $\text{CDCl}_3$ )  $\delta$  7.18 (2H, s), 5.10-5.06 (1H, m), 4.16-3.96 (4H, m), 3.24 (2H, dd,  $J=6.3, 10.3$  Hz), 2.96-2.85 (1H, m), 2.64-2.47 (2H, m), 2.18-1.98 (2H, m), 1.43 (9H, s), 1.32-1.25 (21H, m);  $^{13}\text{C}$  NMR (100 MHz,  $\text{CDCl}_3$ )  $\delta$  171.3 (d,  $J_{\text{CP}}=104.7$  Hz), 153.3-123.9 (aromatic), 81.5, 61.5 (d,  $J_{\text{CP}}=6.6$  Hz), 39.7 (d,  $J_{\text{CP}}=98.7$  Hz), 34.4, 29.7, 28.0, 27.5 (d,  $J_{\text{CP}}=2.8$  Hz), 24.9, 23.5, 22.0 (d,  $J_{\text{CP}}=96.5$  Hz), 16.7 (d,  $J_{\text{CP}}=5.8$  Hz);  $^{31}\text{P}$  NMR (162 MHz,  $\text{CDCl}_3$ )  $\delta$  49.41; IR (KBr) 3221, 1720, 1322, 1158, 1038  $\text{cm}^{-1}$ ; MS  $m/z$  518 ( $\text{MH}^+$ ); HRMS calcd for  $\text{C}_{25}\text{H}_{45}\text{NO}_6\text{PS}$ : 518.2705 ( $\text{MH}^+$ ). Found: 518.2733. Anal. Calcd for  $\text{C}_{25}\text{H}_{44}\text{NO}_6\text{PS}$ : C, 58.00; H, 8.57; N, 2.71. Found: C, 57.90; H, 8.39; N, 2.50.

**(1*R*\*,*R*<sub>P</sub>\*,2*S*\*) and (1*R*\*,*R*<sub>P</sub>\*,2*R*\*)-*tert*-Butyl 2-benzyl-3-[ethoxy(1-[(4-methylphenyl)sulfonyl]amino)-2-phenylethyl)phosphoryl]propanoate (**21a** and **21b**)**

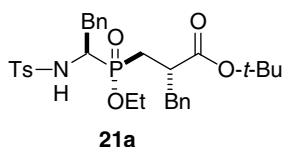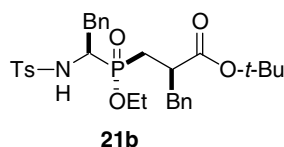

To a stirred solution of **14** (100 mg, 0.20 mmol) in THF (3.0 mL) was added 1.0 M THF solution of LHMDS (0.61 mL, 0.61 mmol) at -78 °C and stirred for 30 minutes at the same temperature. To the mixture was added benzyl bromide (0.08 mL, 0.61 mmol) and stirred for 2 h at the same temperature. The mixture was diluted with saturated NH<sub>4</sub>Cl solution at 0 °C and extracted with Et<sub>2</sub>O. The combined extracts were washed with brine and dried over MgSO<sub>4</sub>. Removal of the solvent gave a residue which was purified by column chromatography (hexane/EtOAc=5:1 to 1:1) to give a **4:1 mixture** of **21a** and **21b** (107 mg, 90%). Analytical samples of individual isomers were obtained upon re-purification by preparative TLC (hexane/EtOAc=1:1).

Deleted: mixture

**21a**; white crystals; mp 155-158 °C; <sup>1</sup>H NMR (400 MHz, CDCl<sub>3</sub>) δ: 7.54-7.03 (14H, m), 6.42 (1H, br.s), 4.07-4.01 (1H, m), 3.92-3.82 (2H, m), 3.13-3.01 (2H, m), 2.89-2.74 (3H, m), 2.33 (3H, s), 2.18-1.97 (2H, m), 1.31 (9H, s), 1.18 (3H, t, *J*=7.0 Hz); <sup>13</sup>C NMR (100 MHz, CDCl<sub>3</sub>) δ: 173.6 (d, *J*<sub>CP</sub>=5.0 Hz), 142.9-126.5 (aromatic), 81.0, 61.6 (d, *J*<sub>CP</sub>=6.9 Hz), 54.5 (d, *J*<sub>CP</sub>=103.1 Hz), 42.0 (d, *J*<sub>CP</sub>=4.3 Hz), 40.1 (d, *J*<sub>CP</sub>=12.0 Hz), 34.9, 28.4 (d, *J*<sub>CP</sub>=90.0 Hz), 27.8, 21.4, 16.4 (d, *J*<sub>CP</sub>=5.6 Hz); <sup>31</sup>P NMR (162 MHz, CDCl<sub>3</sub>) δ: 51.50; IR (KBr) 3139, 1725, 1329, 1031 cm<sup>-1</sup>; MS *m/z* 586 (MH<sup>+</sup>); HRMS calcd for C<sub>31</sub>H<sub>41</sub>NO<sub>6</sub>PS: 586.2392 (MH<sup>+</sup>). Found: 586.2404.

**21b**; white crystals; mp 110-115 °C; <sup>1</sup>H NMR (400 MHz, CDCl<sub>3</sub>) δ: 7.52-7.02 (14H, m), 6.18 (1H, br.d, *J*=8.8 Hz), 4.01-3.39 (3H, m), 3.12-3.02 (2H, m), 2.89 (1H, dd, *J*=6.3, 13.6 Hz), 2.84 (1H, dd, *J*=8.9, 13.6 Hz), 2.76 (1H, ddd, *J*=8.0, 12.4, 14.0 Hz), 2.37 (1H, ddd, *J*=10.0, 15.0, 15.0 Hz), 1.96 (1H, ddd, *J*=3.8, 13.1, 15.7 Hz), 1.28 (9H, s), 1.17 (3H, t, *J*=7.0 Hz); <sup>13</sup>C NMR (100 MHz, CDCl<sub>3</sub>) δ: 173.4 (d, *J*<sub>CP</sub>=4.4 Hz), 142.3-126.5 (aromatic), 81.0, 61.4 (d, *J*<sub>CP</sub>=6.8 Hz), 53.2 (d, *J*<sub>CP</sub>=103.4 Hz), 41.6, 40.4 (d, *J*<sub>CP</sub>=13.5 Hz), 34.9, 27.840, 27.839 (d, *J*<sub>CP</sub>=90.2 Hz), 21.5, 16.4 (d, *J*<sub>CP</sub>=5.2 Hz); <sup>31</sup>P NMR (162 MHz, CDCl<sub>3</sub>) δ: 52.52; IR (KBr) 3088, 1723, 1333, 1161, 1039 cm<sup>-1</sup>; MS *m/z* 608 (MH<sup>+</sup>); HRMS calcd for C<sub>31</sub>H<sub>40</sub>NO<sub>6</sub>NaPS: 608.2212 (MNa<sup>+</sup>). Found: 608.2177.

**(1R\*,R<sub>P</sub>\*,2S\*) and (1R\*,R<sub>P</sub>\*,2R\*)-tert-Butyl 2-benzyl-3-[(1-[(benzyloxy)carbonyl]amino)-2-phenylethyl](ethoxy)phosphorylpropanoate (18a and 18b)**

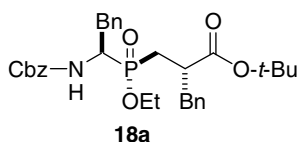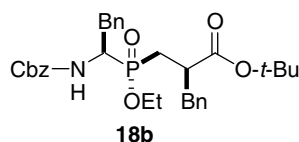

These compounds were prepared from **11** (100 mg, 0.29 mmol) in an analogous manner to that for **21a**. Purification of the residue by column chromatography (hexane/EtOAc=5:1 to 1:1) gave a 1.1:1 mixture of **18a** and **18b** (104 mg, 64 %). Analytical samples of individual isomers were obtained upon re-purification by preparative TLC (hexane/EtOAc=1:1).

Deleted: is

Deleted: was

Deleted: mixture

**18a**; a colorless oil;  $^1\text{H}$  NMR (600 MHz,  $\text{CDCl}_3$ )  $\delta$ : 7.30-7.12 (15H, m), 5.13 (1H, br.d,  $J=9.2$  Hz), 4.97 (1H, d,  $J=12.4$  Hz), 4.91 (1H, d,  $J=12.4$  Hz), 4.33-4.25 (1H, m), 4.16-4.05 (2H, m), 3.21-3.19 (1H, m), 3.03-2.97 (1H, m), 2.89-2.78 (3H, m), 2.20-2.14 (1H, m), 1.83-1.78 (1H, m), 1.33 (9H, s), 1.25 (3H, t,  $J=6.5$  Hz);  $^{13}\text{C}$  NMR (150 MHz,  $\text{CDCl}_3$ )  $\delta$ : 173.7 (d,  $J_{\text{CP}}=3.6$  Hz), 155.9 (d,  $J_{\text{CP}}=3.3$  Hz), 137.9-126.6 (aromatic), 81.1, 66.9, 61.6 (d,  $J_{\text{CP}}=4.7$  Hz), 51.4 (d,  $J_{\text{CP}}=105.4$  Hz), 42.1, 40.1 (d,  $J_{\text{CP}}=11.0$  Hz), 34.5, 29.2 (d,  $J_{\text{CP}}=85.9$  Hz), 27.9, 16.6 (d,  $J_{\text{CP}}=4.9$  Hz);  $^{31}\text{P}$  NMR (162 MHz,  $\text{CDCl}_3$ )  $\delta$ : 50.92; IR (neat) 3223, 1723, 1035  $\text{cm}^{-1}$ ; MS  $m/z$  566 ( $\text{MH}^+$ ); HRMS calcd for  $\text{C}_{32}\text{H}_{41}\text{NO}_6\text{P}$ : 566.2672 ( $\text{MH}^+$ ). Found: 566.2657.

**18b**; white crystals; mp 136-137  $^\circ\text{C}$ ;  $^1\text{H}$  NMR (400 MHz,  $\text{CDCl}_3$ )  $\delta$ : 7.32-7.14 (15H, m), 5.08 (1H, br.d,  $J=8.8$  Hz), 5.00 (1H, d,  $J=12.4$  Hz), 4.94 (1H, d,  $J=12.4$  Hz), 4.37-4.36 (1H, m), 4.20-4.02 (2H, m), 3.20-3.17 (1H, m), 3.02-2.94 (1H, m), 2.91-2.70 (3H, m), 2.34-2.17 (1H, m), 1.84-1.73 (1H, m), 1.32 (9H, s), 1.26 (3H, t,  $J=6.7$  Hz);  $^{13}\text{C}$  NMR (100 MHz,  $\text{CDCl}_3$ )  $\delta$ : 173.3 (d,  $J_{\text{CP}}=2.4$  Hz), 155.8 (d,  $J_{\text{CP}}=3.2$  Hz), 137.9-126.6 (aromatic), 81.1, 66.9, 61.4 (d,  $J_{\text{CP}}=4.1$  Hz), 51.1 (d,  $J_{\text{CP}}=108.3$  Hz), 41.6 (d,  $J_{\text{CP}}=3.4$  Hz), 40.4 (d,  $J_{\text{CP}}=4.6$  Hz), 34.2, 29.3 (d,  $J_{\text{CP}}=76.3$  Hz), 27.9, 16.6;  $^{31}\text{P}$  NMR (162 MHz,  $\text{CDCl}_3$ )  $\delta$ : 52.23; IR (KBr) 3234, 1716, 1047  $\text{cm}^{-1}$ ; MS  $m/z$  566 ( $\text{MH}^+$ ); HRMS calcd for  $\text{C}_{32}\text{H}_{41}\text{NO}_6\text{P}$ : 566.2672 ( $\text{MH}^+$ ). Found: 566.2664.

**(1R\*,R<sub>P</sub>\*,2S\*) and (1R\*,R<sub>P</sub>\*,2R\*)-tert-Butyl 3-[[1-(benzoylamino)-2-phenylethyl]-(ethoxy)phosphoryl]-2-benzylpropanoate (**19a** and **19b**)**

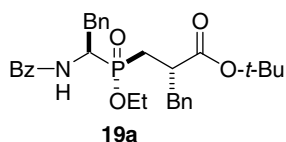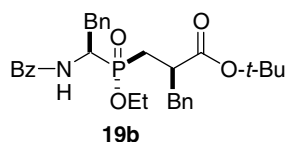

These compounds were prepared from **12** (91 mg, 0.21 mmol) in an analogous manner to that for **21a**. Purification of the residue by column chromatography (hexane/EtOAc=5:1 to 1:1) gave a 3.4:1 mixture of **19a** and **19b** (87 mg, 79 %). Analytical samples of individual isomers were obtained upon re-purification by preparative TLC (hexane/EtOAc=1:1).

Deleted: This

Deleted: was

Deleted: mixture

**19a**; white crystals; mp 135-140 °C;  $^1\text{H}$  NMR (400 MHz,  $\text{CDCl}_3$ )  $\delta$ : 7.68-6.98 (15H, m), 4.89 (1H, ddd,  $J=4.5, 10.1, 20.3$  Hz), 4.12 (2H, m), 3.25 (1H, ddd,  $J=5.1, 6.6, 14.8$  Hz), 3.08-2.93 (2H, m), 2.80 (2H, ddd,  $J=7.4, 13.5, 27.3$  Hz), 2.23 (1H,  $J=9.6, 11.9, 15.7$  Hz), 1.91 (1H, ddd,  $J=4.0, 11.9, 15.8$  Hz), 1.30 (3H, t,  $J=7.3$  Hz), 1.28 (9H, s);  $^{13}\text{C}$  NMR (100 MHz,  $\text{CDCl}_3$ )  $\delta$ : 173.5 (d,  $J_{\text{CP}}=4.9$  Hz), 167.2 (d,  $J_{\text{CP}}=4.2$  Hz), 137.8-126.5 (aromatic), 81.0, 61.6 (d,  $J_{\text{CP}}=7.0$  Hz), 49.6 (d,  $J_{\text{CP}}=104.5$  Hz), 42.0 (d,  $J_{\text{CP}}=4.5$  Hz), 40.1 (d,  $J_{\text{CP}}=11.9$  Hz), 34.0, 28.4 (d,  $J_{\text{CP}}=87.8$  Hz), 27.8, 16.5 (d,  $J_{\text{CP}}=5.8$  Hz);  $^{31}\text{P}$  NMR (162 MHz,  $\text{CDCl}_3$ )  $\delta$ : 51.30; IR (KBr) 3283, 1724, 1657, 1045  $\text{cm}^{-1}$ ; MS  $m/z$  536 ( $\text{MH}^+$ ); HRMS calcd for  $\text{C}_{31}\text{H}_{39}\text{NO}_5\text{P}$ : 536.2566 ( $\text{MH}^+$ ). Found: 536.2540.; Anal. Calcd for  $\text{C}_{31}\text{H}_{38}\text{NO}_5\text{P}$ : C, 69.52; H, 7.15; N, 2.62. Found: C, 69.27; H, 7.45; N, 2.43.

**19b**; white crystals; mp 158-160 °C;  $^1\text{H}$  NMR (400 MHz,  $\text{CDCl}_3$ )  $\delta$ : 7.65-7.07 (15H, m), 7.01 (1H, br.d,  $J=10.0$  Hz), 4.98 (1H, ddd,  $J=4.4, 10.0, 20.1$  Hz), 4.18-3.99 (2H, m), 3.27 (1H, ddd,  $J=4.9, 4.9, 14.4$  Hz), 3.21-2.76 (4H, m), 2.28 (1H, ddd,  $J=10.4, 15.1, 15.1$  Hz), 1.82 (1H,  $J=3.1, 13.0, 15.8$  Hz), 1.31 (9H, s), 1.28 (3H, t,  $J=7.0$  Hz);  $^{13}\text{C}$  NMR (100 MHz,  $\text{CDCl}_3$ )  $\delta$ : 165.5 (d,  $J_{\text{CP}}=3.3$  Hz), 159.5, 132.7-122.4 (aromatic), 80.7, 62.7 (d,  $J_{\text{CP}}=6.3$  Hz), 50.5 (d,  $J_{\text{CP}}=96.3$  Hz), 44.4, 43.6 (d,  $J_{\text{CP}}=12.4$  Hz), 37.5, 32.0, 31.6 (d,  $J_{\text{CP}}=80.9$  Hz), 21.7 (d,  $J_{\text{CP}}=4.6$  Hz);  $^{31}\text{P}$  NMR (162 MHz,  $\text{CDCl}_3$ )  $\delta$ : 52.67; IR (KBr) 3270, 1723, 1655, 1028  $\text{cm}^{-1}$ ; MS  $m/z$  558 ( $\text{MNa}^+$ ); HRMS calcd for  $\text{C}_{31}\text{H}_{38}\text{NO}_5\text{NaP}$ : 558.2385 ( $\text{MNa}^+$ ). Found: 558.2332.; Anal. Calcd for  $\text{C}_{31}\text{H}_{38}\text{NO}_5\text{P}$ : C, 69.52; H, 7.15; N, 2.62. Found: C, 69.62; H, 7.32; N, 2.49.

**(1*R*\*,*R*<sub>P</sub>\*,2*S*\*) and (1*R*\*,*R*<sub>P</sub>\*,2*R*\*)-tert-Butyl 2-benzyl-3-[[1-[(*tert*-butoxycarbonyl)amino]-2-phenylethyl](ethoxy)phosphoryl]propanoate (20a and 20b)**

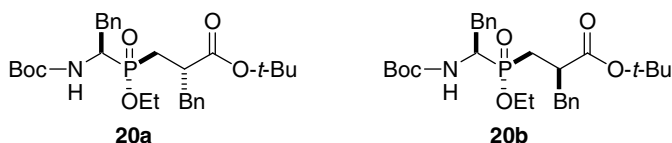

These compounds were prepared from **13** (150 mg, 0.35 mmol) in an analogous manner to that for **21a**. Purification of the residue by column chromatography (hexane/EtOAc=10:1 to 1:1) gave a 4.5:1 mixture of **20a** and **20b** (170 mg, 91 %). Analytical samples of individual isomers were obtained upon re-purification by preparative TLC (hexane/EtOAc=1:1).

Deleted: This

Deleted: was

Deleted: mixture

**20a**; white crystals; mp 118-123 °C;  $^1\text{H}$  NMR (400 MHz,  $\text{CDCl}_3$ )  $\delta$ : 7.36-7.15 (10H, m), 4.84 (1H, br.d,  $J=10.4$  Hz), 4.26-4.24 (1H, m), 4.14-4.07 (2H, m), 3.20-3.17 (1H, m), 3.05-3.04 (1H, m), 2.90-2.79 (3H, m), 2.23-2.16 (1H, m), 1.88-1.80 (1H, m), 1.33 (9H, s), 1.33 (3H, m);  $^{13}\text{C}$  NMR (100 MHz,  $\text{CDCl}_3$ )  $\delta$ : 173.6 (d,  $J_{\text{CP}}=5.7$  Hz), 155.2 (d,  $J_{\text{CP}}=1.8$  Hz), 137.0-126.6 (aromatic), 81.0, 79.9, 61.4 (d,  $J_{\text{CP}}=6.6$  Hz), 50.6 (d,  $J_{\text{CP}}=107.4$  Hz), 41.8 (d,  $J_{\text{CP}}=3.9$  Hz), 40.1

(d,  $J_{CP}$ =11.0 Hz), 34.7, 28.4 (d,  $J_{CP}$ =56.1 Hz), 28.1, 27.9, 16.6 (d,  $J_{CP}$ =5.3 Hz);  $^{31}\text{P}$  NMR (162 MHz,  $\text{CDCl}_3$ )  $\delta$ : 51.37; IR (KBr) 3256, 1710, 1038  $\text{cm}^{-1}$ ; MS  $m/z$  532 ( $\text{MH}^+$ ); HRMS calcd for  $\text{C}_{29}\text{H}_{43}\text{NO}_6\text{P}$ : 532.2828 ( $\text{MH}^+$ ). Found: 532.2806.

**20b**; white crystals; mp 121-124 °C;  $^1\text{H}$  NMR (400 MHz,  $\text{CDCl}_3$ )  $\delta$ : 7.30-7.17 (10H, m), 4.77 (1H, br.d,  $J$ =10.3 Hz), 4.18-3.99 (2H, m), 3.17 (1H, ddd,  $J$ =4.3, 4.3, 14.3 Hz), 3.07-3.00 (1H, m), 2.90-2.74 (3H, m), 2.25 (1H, ddd,  $J$ =9.8, 15.0, 15.0 Hz), 1.87 (1H, ddd,  $J$ =3.1, 12.5, 15.6 Hz), 1.30 (18H, s), 1.30-1.26 (3H, m);  $^{13}\text{C}$  NMR (100 MHz,  $\text{CDCl}_3$ )  $\delta$ : 173.3 (d,  $J_{CP}$ =4.6 Hz), 155.1 (d,  $J_{CP}$ =1.8 Hz), 137.0-126.6 (aromatic), 80.9, 80.0, 61.3, 49.0 (d,  $J_{CP}$ =105.4 Hz), 41.5, 40.6 (d,  $J_{CP}$ =12.3 Hz), 34.3, 28.1, 27.889, 27.884 (d,  $J_{CP}$ =90.2 Hz), 16.6 (d,  $J_{CP}$ =5.0 Hz);  $^{31}\text{P}$  NMR (162 MHz,  $\text{CDCl}_3$ )  $\delta$ : 52.23; IR (KBr) 3226, 1723, 1791, 1033  $\text{cm}^{-1}$ ; MS  $m/z$  532 ( $\text{MH}^+$ ); HRMS calcd for  $\text{C}_{29}\text{H}_{43}\text{NO}_6\text{P}$ : 532.2828 ( $\text{MH}^+$ ). Found: 532.2807.

**(1*R*\*,*R*<sub>P</sub>\*,2*S*\*)-tert-Butyl 2-benzyl-3-[ethoxy(2-phenyl-1-[(2,4,6-triisopropylphenyl)sulfonyl]amino)ethyl]phosphoryl]propanoate (22a)**

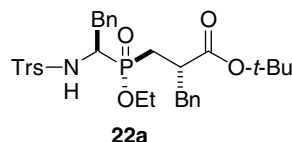

This compound was prepared from **15** (100 mg, 0.16 mmol) in an analogous manner to that for **21a**. Purification of the residue by column chromatography (hexane/EtOAc=5:1 to 1:1) gave **22a** (89 mg, 78%). The diastereomeric ratio (21:1) was determined by  $^{31}\text{P}$  NMR (121 MHz,  $\text{CDCl}_3$ ) based on two peaks ( $\delta$  51.03 (major isomer), 49.99 (minor isomer)) corresponding to the phosphorus atoms. White crystals; mp 157-159 °C;  $^1\text{H}$  NMR (400 MHz,  $\text{CDCl}_3$ )  $\delta$  7.28-6.99 (12H, m), 5.36 (1H, m), 4.12-3.96 (4H, m), 3.91-3.82 (1H, m), 3.14-2.72 (6H, m), 2.02-1.92 (1H, m), 1.70 (1H, ddd,  $J$ =3.8, 12.1, 15.8 Hz), 1.31 (9H, s), 1.28-1.23 (18H, m), 1.15 (3H, t,  $J$ =7.0 Hz);  $^{13}\text{C}$  NMR (100 MHz,  $\text{CDCl}_3$ )  $\delta$  173.6 (d,  $J_{CP}$ =4.5 Hz), 152.7-123.8 (aromatic), 81.0, 61.3 (d,  $J_{CP}$ =6.9 Hz), 53.6 (d,  $J_{CP}$ =100.5 Hz), 41.9 (d,  $J_{CP}$ =4.5 Hz), 40.1 (d,  $J_{CP}$ =12.5 Hz), 35.9, 34.1, 29.9, 28.7 (d,  $J_{CP}$ =94.6 Hz), 27.8, 24.9 (d,  $J_{CP}$ =12.7 Hz), 23.6 (d,  $J_{CP}$ =3.2 Hz), 16.3 (d,  $J_{CP}$ =5.8 Hz);  $^{31}\text{P}$  NMR (162 MHz,  $\text{CDCl}_3$ )  $\delta$  50.85; IR (KBr) 3114, 1729, 1328, 1146, 1038  $\text{cm}^{-1}$ ; MS  $m/z$  698 ( $\text{MH}^+$ ); HRMS calcd for  $\text{C}_{39}\text{H}_{56}\text{NO}_6\text{PS}$ : 698.3644 ( $\text{MH}^+$ ). Found: 698.3671.; Anal. Calcd for  $\text{C}_{39}\text{H}_{56}\text{NO}_6\text{PS}$ : C, 67.12; H, 8.09; N, 2.01. Found: C, 67.09; H, 7.99; N, 1.76.

**(1*R*\*,*R*<sub>P</sub>\*,2*S*\*)-tert-Butyl 3-[ethoxy(2-phenyl-1-[(2,4,6-triisopropylphenyl)sulfonyl]amino)ethyl]phosphoryl]-2-methylpropanoate (23)**

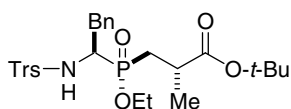

This compound was prepared from **15** (20 mg, 0.03 mmol) and methyl iodide (7  $\mu$ L, 0.11 mmol) in an analogous manner to that for **21a**. Purification of the residue by column chromatography (hexane/EtOAc=5:1 to 2:1) gave **23** (16.7 mg, 82%). [The diastereomeric ratio \(24:1\) was determined by  \$^{31}\text{P}\$  NMR \(121 MHz,  \$\text{CDCl}\_3\$ \) based on two peaks \( \$\delta\$  51.06 \(major isomer\), 50.31 \(minor isomer\)\) corresponding to the phosphorus atoms](#). White crystals; mp 146-147  $^\circ\text{C}$ ;  $^1\text{H}$  NMR (400 MHz,  $\text{CDCl}_3$ )  $\delta$  7.15-7.05 (7H, m), 5.56-6.63 (1H, m), 4.08-3.97 (4H, m), 3.89-3.73 (1H, m), 3.13 (1H, ddd,  $J=7.1, 13.9, 13.9$  Hz), 2.95-2.85 (2H, m), 2.79-2.71 (1H, m), 2.11 (1H, ddd,  $J=8.4, 12.3, 15.7$  Hz), 1.65 (1H, ddd,  $J=5.2, 11.7, 15.7$  Hz), 1.43 (9H, s), 1.30-1.23 (18H, m), 1.16 (3H, t,  $J=6.9$  Hz), 1.14 (3H, t,  $J=7.0$  Hz);  $^{13}\text{C}$  NMR (100 MHz,  $\text{CDCl}_3$ )  $\delta$  174.9 (d,  $J_{\text{CP}}=6.9$  Hz), 153.4-123.7 (aromatic), 80.6, 61.2 (d,  $J_{\text{CP}}=7.0$  Hz), 53.6 (d,  $J_{\text{CP}}=101.6$  Hz), 35.8 (d,  $J_{\text{CP}}=1.6$  Hz), 35.0 (d,  $J_{\text{CP}}=4.7$  Hz), 34.1, 29.90 (d,  $J_{\text{CP}}=70.5$  Hz), 29.86, 27.9, 25.1, 24.8, 23.6, 23.5, 19.4 (d,  $J_{\text{CP}}=11.0$  Hz), 16.2 (d,  $J_{\text{CP}}=5.9$  Hz);  $^{31}\text{P}$  NMR (162 MHz,  $\text{CDCl}_3$ )  $\delta$  51.13; IR (KBr) 3120, 1733, 1326, 1153, 1038  $\text{cm}^{-1}$ ; MS  $m/z$  622 ( $\text{MH}^+$ ); HRMS calcd for  $\text{C}_{33}\text{H}_{53}\text{NO}_6\text{PS}$ : 622.3331 ( $\text{MH}^+$ ). Found: 622.3320.; Anal. Calcd for  $\text{C}_{33}\text{H}_{52}\text{NO}_6\text{PS}$ : C, 63.78; H, 8.43; N, 2.25. Found: C, 63.69; H, 8.38; N, 1.92.

**(1R\*, $R_P$ \*,2S\*)-tert-Butyl 2-[[ethoxy(2-phenyl-1-[(2,4,6-triisopropylphenyl)sulfonyl]amino)ethyl]phosphoryl]methyl]pent-4-enoate (**24**)**

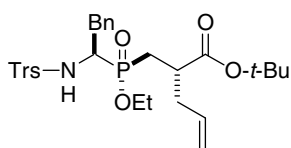

This compound was prepared from **15** (20 mg, 0.03 mmol) and allyl bromide (9  $\mu$ L, 0.11 mmol) in an analogous manner to that for **21a**. Purification of the residue by column chromatography (hexane/EtOAc=5:1 to 3:2) gave **24** (18 mg, 83%). [The diastereomeric ratio \(21:1\) was determined by  \$^{31}\text{P}\$  NMR \(121 MHz,  \$\text{CDCl}\_3\$ \) based on two peaks \( \$\delta\$  51.32 \(major isomer\), 50.29 \(minor isomer\)\) corresponding to the phosphorus atoms](#). White crystals; mp 115-118  $^\circ\text{C}$ ;  $^1\text{H}$  NMR (400 MHz,  $\text{CDCl}_3$ )  $\delta$  7.14-7.03 (7H, m), 5.62 (1H, dddd,  $J=7.0, 7.0, 10.1, 16.9$  Hz), 5.46-5.43 (1H, m), 5.04-4.99 (2H, m), 4.11-3.98 (4H, m), 3.86 (1H, ddd,  $J=2.9, 7.1, 14.2$  Hz), 3.11 (1H, ddd,  $J=7.1, 14.3, 14.3$  Hz), 2.94-2.85 (2H, m), 2.83-2.74 (1H, m), 2.28-2.25 (2H, m), 2.01 (1H, ddd,  $J=9.8, 12.0, 15.7$  Hz), 1.69 (1H, ddd,  $J=3.9, 12.1, 15.8$  Hz), 1.43 (9H, s), 1.28-1.23 (18H, m), 1.15 (3H, t,  $J=7.0$  Hz);  $^{13}\text{C}$  NMR (100 MHz,  $\text{CDCl}_3$ )  $\delta$  173.6 (d,  $J_{\text{CP}}=4.7$

Hz), 152.7-123.7 (aromatic), 134.0, 117.8, 81.0, 61.3 (d,  $J_{\text{CP}}=7.0$  Hz), 53.6 (d,  $J_{\text{CP}}=101.0$  Hz), 39.8 (d,  $J_{\text{CP}}=4.5$  Hz), 38.1 (d,  $J_{\text{CP}}=12.0$  Hz), 35.9 (d,  $J_{\text{CP}}=2.0$  Hz), 34.1, 29.9, 28.0, 27.9 (d,  $J_{\text{CP}}=90.5$  Hz), 24.9, 24.8, 23.6, 23.5, 16.2 (d,  $J_{\text{CP}}=5.8$  Hz);  $^{31}\text{P}$  NMR (162 MHz,  $\text{CDCl}_3$ )  $\delta$  51.14; IR (KBr) 3137, 1728, 1330, 1156, 1044  $\text{cm}^{-1}$ ; MS  $m/z$  648 ( $\text{MH}^+$ ); HRMS calcd for  $\text{C}_{35}\text{H}_{55}\text{NO}_6\text{PS}$ : 648.3488 ( $\text{MH}^+$ ). Found: 648.3504.

**(1*R*\*,*R*<sub>P</sub>\*,2*S*\*)-tert-Butyl 2-[[ethoxy(2-phenyl-1-[[[(2,4,6-triisopropylphenyl)sulfonyl]amino]ethyl)phosphoryl]methyl]-4-methylpent-4-enoate (25)**

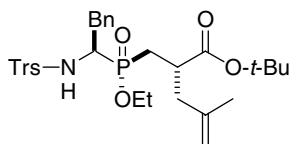

This compound was prepared from **15** (100 mg, 0.16 mmol) and methallyl bromide (0.05 mL, 0.53 mmol) in an analogous manner to that for **21a**. Purification of the residue by column chromatography (hexane/EtOAc=5:1 to 1:1) gave **25** (73 mg, 69%). [The diastereomeric ratio \(29:1\) was determined by  \$^{31}\text{P}\$  NMR \(121 MHz,  \$\text{CDCl}\_3\$ \) based on two peaks \( \$\delta\$  51.30 \(major isomer\), 50.34 \(minor isomer\)\) corresponding to the phosphorus atoms.](#) A colorless oil;  $^1\text{H}$  NMR (400 MHz,  $\text{CDCl}_3$ )  $\delta$  7.13-7.03 (7H, m), 5.48-5.45 (1H, m), 4.76 (1H, s), 4.65 (1H, s), 4.11-3.98 (4H, m), 3.86 (1H, ddd,  $J=2.9, 7.1, 14.2$  Hz), 3.11 (1H, ddd,  $J=7.2, 14.2, 14.2$  Hz), 2.94-2.83 (3H, m), 2.26 (1H, dd,  $J=8.1, 13.7$  Hz), 2.11 (1H, dd,  $J=7.1, 13.7$  Hz), 1.97 (1H, dd,  $J=10.1, 11.6, 15.6$  Hz), 1.74-1.66 (1H, m), 1.71 (3H, s), 1.43 (9H, s), 1.28-1.23 (18H, m), 1.15 (3H, t,  $J=7.0$  Hz);  $^{13}\text{C}$  NMR (100 MHz,  $\text{CDCl}_3$ )  $\delta$  174.0 (d,  $J_{\text{CP}}=4.4$  Hz), 152.6-123.7 (aromatic), 134.3, 113.5, 81.0, 61.3 (d,  $J_{\text{CP}}=6.8$  Hz), 53.6 (d,  $J_{\text{CP}}=100.6$  Hz), 42.7 (d,  $J_{\text{CP}}=12.5$  Hz), 38.4 (d,  $J_{\text{CP}}=4.7$  Hz), 35.9 (d,  $J_{\text{CP}}=2.0$  Hz), 34.1, 29.9, 28.4 (d,  $J_{\text{CP}}=94.3$  Hz), 28.0, 24.9, 24.8, 23.55, 23.50, 21.7, 16.2 (d,  $J_{\text{CP}}=5.9$  Hz);  $^{31}\text{P}$  NMR (162 MHz,  $\text{CDCl}_3$ )  $\delta$  51.13; IR (KBr) 3143, 1725, 1650, 1332, 1161  $\text{cm}^{-1}$ ; MS  $m/z$  684 ( $\text{MNa}^+$ ); HRMS calcd for  $\text{C}_{36}\text{H}_{56}\text{NO}_6\text{NaPS}$ : 684.3464 ( $\text{MNa}^+$ ). Found: 684.3469.; Anal. Calcd for  $\text{C}_{36}\text{H}_{56}\text{NO}_6\text{PS}$ : C, 65.33; H, 8.53; N, 2.12. Found: C, 65.26; H, 8.44; N, 1.79.

**(1*R*\*,*R*<sub>P</sub>\*,2*S*\*)-tert-Butyl 2-[[ethoxy(2-phenyl-1-[[[(2,4,6-triisopropylphenyl)sulfonyl]amino]ethyl)phosphoryl]methyl]-4-methylpentanoate (26)**

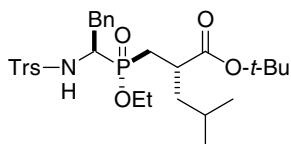



This compound was prepared from **15** (100 mg, 0.16 mmol) and *i*-butyl iodide (0.06 mL, 0.53 mmol) in an analogous manner to that for **21a** **except for stirring the final reaction mixture at rt in 3 h**. Purification of the residue by column chromatography (hexane/EtOAc=5:1 to 3:1) gave **26** (67 mg, 62%). **The diastereomeric ratio (14:1) was determined by <sup>31</sup>P NMR (121 MHz, CDCl<sub>3</sub>) based on two peaks (δ 51.88 (major isomer), 53.21 (minor isomer)) corresponding to the phosphorus atoms**. White crystals; mp 152-153 °C; <sup>1</sup>H NMR (400 MHz, CDCl<sub>3</sub>) δ 7.12-7.03 (7H, m), 5.31-5.28 (1H, m), 4.11-3.97 (4H, m), 3.86 (1H, ddd, *J*=2.9, 7.1, 14.2 Hz), 3.10 (1H, ddd, *J*=7.3, 14.1, 14.1 Hz), 1.97 (1H, ddd, *J*=9.8, 11.9, 15.5 Hz), 1.66 (1H, ddd, *J*=4.0, 11.8, 15.6 Hz), 1.60-1.48 (1H, m), 1.44 (9H, s), 1.28-1.23 (20H, m), 1.14 (3H, t, *J*=7.0 Hz), 0.90 (3H, d, *J*=6.5 Hz), 0.87 (3H, d, *J*=6.5 Hz); <sup>13</sup>C NMR (100 MHz, CDCl<sub>3</sub>) δ 174.7 (d, *J*<sub>CP</sub>=5.0 Hz), 152.7-123.8 (aromatic), 80.7, 61.3 (d, *J*<sub>CP</sub>=6.8 Hz), 53.6 (d, *J*<sub>CP</sub>=100.3 Hz), 43.5 (d, *J*<sub>CP</sub>=11.5 Hz), 38.5 (d, *J*<sub>CP</sub>=4.6 Hz), 35.9, 34.1, 29.9, 29.3 (d, *J*<sub>CP</sub>=90.0 Hz), 28.0, 25.7, 24.94, 24.85, 23.6 (d, *J*<sub>CP</sub>=11.0 Hz), 22.9, 22.0, 16.2 (d, *J*<sub>CP</sub>=5.7 Hz); <sup>31</sup>P NMR (162 MHz, CDCl<sub>3</sub>) δ 51.10; IR (KBr) 3113, 1726, 1330, 1164, 1036 cm<sup>-1</sup>; MS *m/z* 686 (MNa<sup>+</sup>); HRMS calcd for C<sub>36</sub>H<sub>58</sub>NO<sub>6</sub>NaPS: 686.3620 (MNa<sup>+</sup>). Found: 686.3615.

**Deleted:** The diastereomeric ratio (14:1) was determined by <sup>31</sup>P NMR (121 MHz, CDCl<sub>3</sub>) based on two peaks (δ 51.88 (major isomer), 53.21 (minor isomer)) corresponding to the phosphorus atoms).

**(1*R*\*,*R*<sub>P</sub>\*,2*S*\*)-tert-Butyl 2-[[ethoxy(2-phenyl-1-[(2,4,6-triisopropylphenyl)sulfonyl]amino)ethyl]phosphoryl]methyl}but-3-ynoate (**27**)**

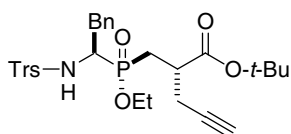

This compound was prepared from **15** (20 mg, 0.03 mmol) and propargyl chloride (8 mL, 0.11 mmol) in an analogous manner to that for **21a** **except for stirring the final reaction mixture at -20°C in 17 h**. Purification of the residue by column chromatography (hexane/EtOAc=5:1 to 1:1) gave **27** (18 mg, 84%). **The diastereomeric ratio (17:1) was determined by <sup>31</sup>P NMR (121 MHz, CDCl<sub>3</sub>) based on two peaks (δ 50.83 (major isomer), 49.86 (minor isomer)) corresponding to the phosphorus atoms**. A colorless oil; <sup>1</sup>H NMR (400 MHz, CDCl<sub>3</sub>) δ 7.19-7.04 (7H, m), 5.37-5.34 (1H, m), 4.15-3.95 (4H, m), 3.86 (1H, ddd, *J*=2.9, 7.0, 14.1 Hz), 3.13 (1H, ddd, *J*=7.1, 14.2, 14.2 Hz), 2.97-2.84 (3H, m), 2.59-2.41 (2H, m), 2.19 (1H, ddd, *J*=8.5, 12.5, 15.7 Hz), 1.98 (1H, t, *J*=2.5 Hz), 1.88 (1H, ddd, *J*=4.7, 11.7, 16.1 Hz), 1.46 (9H, s), 1.27-1.22 (18H, m), 1.14 (3H, t, *J*=7.0 Hz); <sup>13</sup>C NMR (100 MHz, CDCl<sub>3</sub>) δ 172.2 (d, *J*<sub>CP</sub>=6.4 Hz), 152.9-123.8 (aromatic), 81.5, 79.9, 71.1, 61.4 (d, *J*<sub>CP</sub>=6.8 Hz), 54.1 (d, *J*<sub>CP</sub>=102.1 Hz), 39.2 (d, *J*<sub>CP</sub>=4.1 Hz), 35.9 (d, *J*<sub>CP</sub>=1.8 Hz), 34.1, 29.9, 27.9, 27.2 (d, *J*<sub>CP</sub>=91.1 Hz), 24.9, 24.8, 23.6, 23.5, 22.9 (d, *J*<sub>CP</sub>=11.1 Hz), 16.2 (d, *J*<sub>CP</sub>=5.9 Hz); <sup>31</sup>P NMR (162 MHz, CDCl<sub>3</sub>) δ 50.94;

**Deleted:**

IR (neat) 3311, 3065, 2121, 1733, 1329  $\text{cm}^{-1}$ ; MS  $m/z$  668 ( $\text{MNa}^+$ ); HRMS calcd for  $\text{C}_{35}\text{H}_{52}\text{NO}_6\text{NaPS}$ : 668.3151 ( $\text{MNa}^+$ ). Found: 668.3153.

**(1*R*\*,*R*<sub>P</sub>\*,2*S*\*)-tert-Butyl 2-benzyl-3-[ethoxy(3-methyl-1-[(2,4,6-triisopropylphenyl)sulfonyl]amino)butyl]phosphoryl]propanoate (28)**

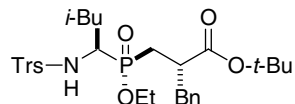

This compound was prepared from **16** (49 mg, 0.09 mmol) in an analogous manner to that for **21a**. Purification of the residue by column chromatography (hexane/EtOAc=5:1 to 3:1) gave **28** (30 mg, 54%). [The diastereomeric ratio \(14:1\) was determined by  \$^{31}\text{P}\$  NMR \(121 MHz,  \$\text{CDCl}\_3\$ \) based on two peaks \( \$\delta\$  51.44 \(major isomer\), 53.40 \(minor isomer\)\) corresponding to the phosphorus atoms.](#) White crystals; mp 142-143  $^{\circ}\text{C}$ ;  $^1\text{H}$  NMR (400 MHz,  $\text{CDCl}_3$ )  $\delta$ : 7.28-7.11 (7H, m), 5.20 (1H, br.d,  $J=8.8$  Hz), 4.12-4.03 (4H, m), 3.77-3.68 (1H, m), 3.13-3.04 (1H, m), 2.95-2.80 (4H, m), 2.25-2.51 (1H, m), 2.06-1.99 (1H, m), 1.51-1.43 (1H, m), 1.33 (9H, s), 1.30-1.23 (21H, m), 0.66 (3H, d,  $J=7.2$  Hz), 0.65 (3H, d,  $J=6.8$  Hz);  $^{13}\text{C}$  NMR (100 MHz,  $\text{CDCl}_3$ )  $\delta$ : 174.0 (d,  $J_{\text{CP}}=3.8$  Hz), 152.7-123.6 (aromatic), 81.1, 61.5 (d,  $J_{\text{CP}}=6.3$  Hz), 50.4 (d,  $J_{\text{CP}}=103.9$  Hz), 42.3, 40.4 (d,  $J_{\text{CP}}=12.4$  Hz), 39.0, 34.2, 30.0, 29.2 (d,  $J_{\text{CP}}=102.2$  Hz), 27.9, 24.9, 24.8, 24.2 (d,  $J_{\text{CP}}=8.7$  Hz), 23.64, 23.61, 22.9, 21.5, 16.5 (d,  $J_{\text{CP}}=5.0$  Hz);  $^{31}\text{P}$  NMR (162 MHz,  $\text{CDCl}_3$ )  $\delta$ : 51.52; IR (KBr) 3106, 1732, 1040  $\text{cm}^{-1}$ ; MS  $m/z$  664 ( $\text{MH}^+$ ); HRMS calcd for  $\text{C}_{36}\text{H}_{59}\text{NO}_6\text{PS}$ : 664.3801 ( $\text{MH}^+$ ). Found: 664.3802.

**(*R*<sub>P</sub>\*,2*S*\*)-tert-Butyl 2-benzyl-3-[ethoxy({[(2,4,6-triisopropylphenyl)sulfonyl]amino}methyl)phosphoryl]propanoate (29)**

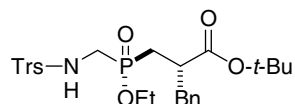

This compound was prepared from **17** (88 mg, 0.17 mmol) in an analogous manner to that for **21a**. Purification of the residue by column chromatography (hexane/EtOAc=10:1 to 1:1) gave **29** (31 mg, 30%). [The diastereomeric ratio \(18:1\) was determined by  \$^{31}\text{P}\$  NMR \(121 MHz,  \$\text{CDCl}\_3\$ \) based on two peaks \( \$\delta\$  47.41 \(major isomer\), 49.43 \(minor isomer\)\) corresponding to the phosphorus atoms.](#) White crystals; mp 116-118  $^{\circ}\text{C}$ ;  $^1\text{H}$  NMR (400 MHz,  $\text{CDCl}_3$ )  $\delta$ : 7.28-7.14 (7H, m), 4.99-4.95 (1H, m), 4.15-4.00 (4H, m), 3.26 (1H, ddd,  $J=6.9, 10.8, 14.3$  Hz), 3.15 (1H, ddd,  $J=5.3, 9.3, 14.4$  Hz), 3.06-2.80 (5H, m), 2.19 (1H, ddd,  $J=9.4, 12.8, 15.4$  Hz), 1.89 (1H, ddd,  $J=3.7, 15.1, 15.1$  Hz), 1.34 (9H, s), 1.28-1.25 (21H, m);  $^{13}\text{C}$  NMR (100 MHz,

CDCl<sub>3</sub>)  $\delta$ : 173.3 (d,  $J_{CP}$ =4.3 Hz), 153.2-123.9 (aromatic), 81.4, 61.7 (d,  $J_{CP}$ =6.6 Hz), 41.7 (d,  $J_{CP}$ =3.6 Hz), 41.4 (d,  $J_{CP}$ =97.1 Hz), 34.1, 29.7, 28.8 (d,  $J_{CP}$ =94.6 Hz), 27.9, 24.93, 24.91, 23.5, 16.5 (d,  $J_{CP}$ =5.4 Hz); <sup>31</sup>P NMR (162 MHz, CDCl<sub>3</sub>)  $\delta$ : 47.51; IR (KBr) 3136, 1731, 1035 cm<sup>-1</sup>; MS  $m/z$  608 (MH<sup>+</sup>); HRMS calcd for C<sub>32</sub>H<sub>51</sub>NO<sub>6</sub>PS: 608.3175 (MH<sup>+</sup>). Found: 608.3195.

**(1*R*\*,*R*<sub>P</sub>\*,2*S*\*)-tert-Butyl 2-benzyl-3-[(1-[(benzyloxy)carbonyl] [(2,4,6-triisopropylphenyl)sulfonyl]amino}-2-phenylethyl)(ethoxy)phosphoryl] propanoate (30)**

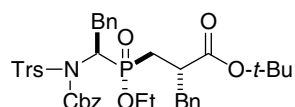

To sodium hydride (50%, 21 mg, 0.84 mmol) was added a solution of **22a** (200 mg, 0.29 mmol) in THF (1.2 mL) at 0 °C and stirred for 30 minutes at the same temperature. To the mixture was added CbzCl (0.11 mL, 0.84 mmol), DMAP (35 mg, 0.29 mmol) and stirred for 17 h at room temperature. The mixture was diluted with saturated NH<sub>4</sub>Cl solution and extracted with Et<sub>2</sub>O. The combined extracts were washed with brine and dried over MgSO<sub>4</sub>. Removal of the solvent gave a residue which was purified by column chromatography (hexane/EtOAc=5:1 to 4:1) to give **30** (199.9 mg, 84 %). White crystals; mp 110-115 °C; <sup>1</sup>H NMR (400 MHz, CDCl<sub>3</sub>)  $\delta$  7.71-6.97 (17H, m), 5.18 (1H, d,  $J$ =12.4 Hz), 5.15 (1H, d,  $J$ =13.1 Hz), 4.90 (1H, ddd,  $J$ =2.6, 11.1, 11.1 Hz), 4.07-3.96 (3H, m), 3.94-3.84 (1H, m), 3.71 (1H, ddd,  $J$ =10.7, 12.5, 12.5 Hz), 3.05 (1H, ddd,  $J$ =2.3, 13.9, 23.6 Hz), 2.95-2.86 (3H, m), 2.79-2.73 (1H, m), 1.28-1.25 (12H, m), 1.27 (9H, m), 1.17 (3H, t,  $J$ =7.1 Hz), 1.15 (6H, t,  $J$ =6.7 Hz); <sup>13</sup>C NMR (100 MHz, CDCl<sub>3</sub>)  $\delta$  173.0 (d,  $J_{CP}$ =8.6 Hz), 154.0-124.1 (aromatic), 80.5, 68.6, 61.5 (d,  $J_{CP}$ =6.8 Hz), 57.6 (d,  $J_{CP}$ =91.0 Hz), 41.4 (d,  $J_{CP}$ =4.2 Hz), 39.6 (d,  $J_{CP}$ =9.3 Hz), 36.8, 34.2, 31.8 (d,  $J_{CP}$ =92.8 Hz), 29.4, 27.8, 24.8, 24.7, 23.5, 16.3 (d,  $J_{CP}$ =6.0 Hz); <sup>31</sup>P NMR (162 MHz, CDCl<sub>3</sub>)  $\delta$  48.01; IR (KBr) 1729, 1338, 1152, 1042 cm<sup>-1</sup>; MS  $m/z$  832 (MH<sup>+</sup>); HRMS calcd for C<sub>47</sub>H<sub>63</sub>NO<sub>8</sub>PS: 832.4012 (MH<sup>+</sup>). Found: 832.4039.; Anal. Calcd for C<sub>47</sub>H<sub>62</sub>NO<sub>8</sub>PS: C, 67.85; H, 7.51; N, 1.68. Found: C, 67.90; H, 7.40; N, 1.69.

**(1*R*\*,*R*<sub>P</sub>\*,2*S*\*)-tert-Butyl 2-benzyl-3-[(1-[(benzyloxy)carbonyl]amino} -2-phenylethyl)(ethoxy)phosphoryl]propanoate (18a)**

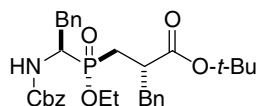

To a stirred solution of **30** (40 mg, 0.05 mmol) in THF (1.4 mL) was added a 0.1 M THF

solution of  $\text{SmI}_2$  (2.3 mL, 0.23 mmol) at 0 °C and stirred for 30 minutes at the same temperature. The mixture was diluted with saturated  $\text{K}_2\text{CO}_3$  solution and extracted with EtOAc. The combined extracts were washed with brine and dried over  $\text{MgSO}_4$ . Removal of the solvent gave a residue which was purified by column chromatography (hexane/EtOAc=10:1 to 2:1) to give **18a** (17 mg, 61 %). The  $^1\text{H}$  and  $^{13}\text{C}$  NMR spectra were identical to those of a sample prepared from **11** with benzyl bromide.

**(1*R*\*,*R*<sub>P</sub>\*,2*S*\*)-tert-Butyl 3-[[1-amino-2-phenylethyl](ethoxy)phosphoryl]-2-benzylpropanoate (**31**)**

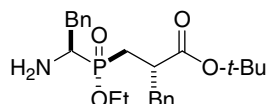

To a solution of **18a** (17 mg, 0.03 mmol) in MeOH (0.3 mL) was added 20%  $\text{Pd}(\text{OH})_2\text{-C}$  (4 mg) and stirred for 3 h at room temperature under a hydrogen atmosphere. The catalyst was removed by filtration through a pad of Celite and the filtrate was concentrated to give a residue. To a solution of the residue in  $\text{CH}_2\text{Cl}_2$  (0.3 mL) was added  $\text{Et}_3\text{N}$  (4.2  $\mu\text{L}$ , 0.03 mmol) and stirred for 30 minutes at room temperature. The mixture was concentrated to give a residue which was purified by preparative TLC (hexane/EtOAc=1:1) to give **31** (9.6 mg, 74 %). A colorless oil;  $^1\text{H}$  NMR (400 MHz,  $\text{CDCl}_3$ )  $\delta$  7.32-7.17 (10H, m), 4.16-3.75 (2H, m), 5.15 (4H, m), 2.85 (1H, ddd,  $J=5.8, 5.8, 11.6$  Hz), 2.57 (1H, ddd,  $J=7.8, 10.9, 13.8$  Hz), 2.34 (1H, ddd,  $J=9.0, 12.1, 15.5$  Hz), 1.85 (1H, ddd,  $J=3.7, 13.2, 15.5$  Hz), 1.35 (9H, s), 1.30 (3H, t,  $J=7.4$  Hz);  $^{13}\text{C}$  NMR (100 MHz,  $\text{CDCl}_3$ )  $\delta$  173.6 (d,  $J_{\text{CP}}=4.8$  Hz), 138.2-126.6 (aromatic), 80.9, 60.8 (d,  $J_{\text{CP}}=7.0$  Hz), 52.1 (d,  $J_{\text{CP}}=5.3$  Hz), 42.1 (d,  $J_{\text{CP}}=3.5$  Hz), 40.2 (d,  $J_{\text{CP}}=11.4$  Hz), 36.6, 27.8, 26.3 (d,  $J_{\text{CP}}=86.6$  Hz), 16.7 (d,  $J_{\text{CP}}=11.2$  Hz);  $^{31}\text{P}$  NMR (162 MHz,  $\text{CDCl}_3$ )  $\delta$  54.38; IR (neat) 3381, 3303, 1727, 1369, 1153  $\text{cm}^{-1}$ ; MS  $m/z$  432 ( $\text{MH}^+$ ); HRMS calcd for  $\text{C}_{24}\text{H}_{35}\text{NO}_4\text{P}$ : 432.2304 ( $\text{MH}^+$ ). Found: 432.2311.

**Crystallographic data of 15**

Crystallographic data (excluding structure factor) for the X-ray crystal structure analysis of **15** have been deposited with Cambridge Crystallographic Data Center (CCDC) as supplementary publication No. CCDC 690666. This data can be obtained free of charge from the CCDC via [www.ccdc.cam.ac.uk/data\\_request/cif](http://www.ccdc.cam.ac.uk/data_request/cif).

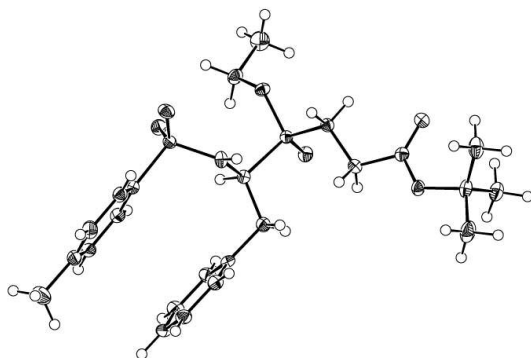

Ortep drawing of **15**

### Crystallographic data of **21a**

Crystallographic data (excluding structure factor) for the X-ray crystal structure analysis of **21a** have been deposited with Cambridge Crystallographic Data Center (CCDC) as supplementary publication No. CCDC 690665. This data can be obtained free of charge from the CCDC via [www.ccdc.cam.ac.uk/data\\_request/cif](http://www.ccdc.cam.ac.uk/data_request/cif).

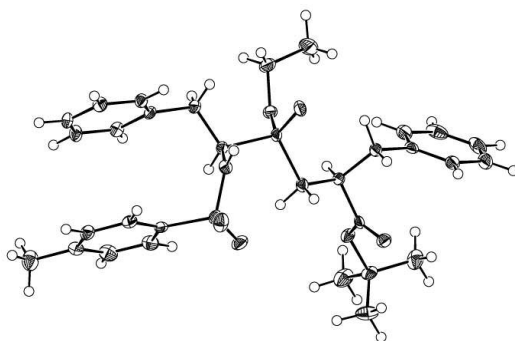

Ortep drawing of **21a**

### References

1. Yamagishi, T.; Haruki, T.; Yokomatsu, T. *Tetrahedron* **2006**, *62*, 9210.
2. Haruki, T.; Yamagishi, T.; Yokomatsu, T. *Tetrahedron: Asymmetry* **2007**, *18*, 2886.
